# Supplementary material for: A phosphatized NiCo LDH 1D dendritic electrode for high energy asymmetric supercapacitors
Source: Royal Society of Chemistry journal article supplement (doi:10.1039/c9dt02955a), 2019-01-01
Supplement: c9dt02955a1.pdf [file c9dt02955a1.pdf]

## Supplementary information

### Phosphatized NiCo LDHs 1D Dendritic Electrode for High Energy Asymmetric Supercapacitor

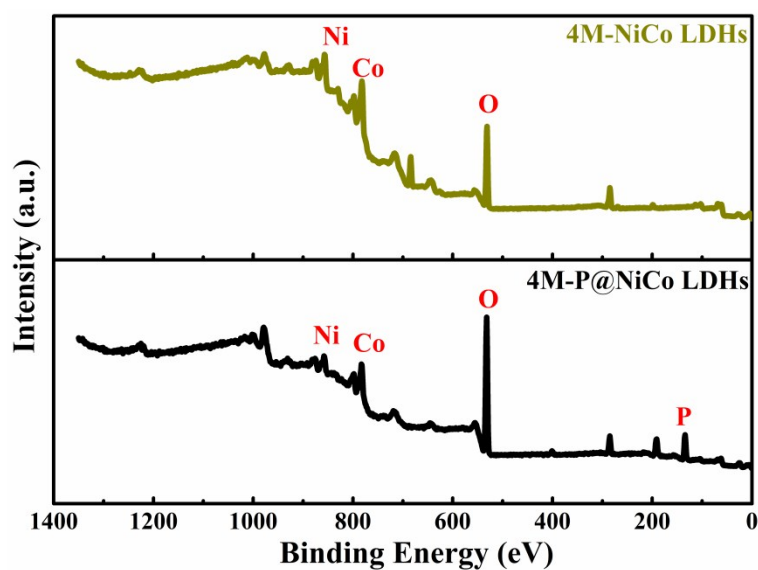

Fig. S1. The full XPS spectra of the 4M-NiCo LDHs and 4M-P@NiCo LDHs.

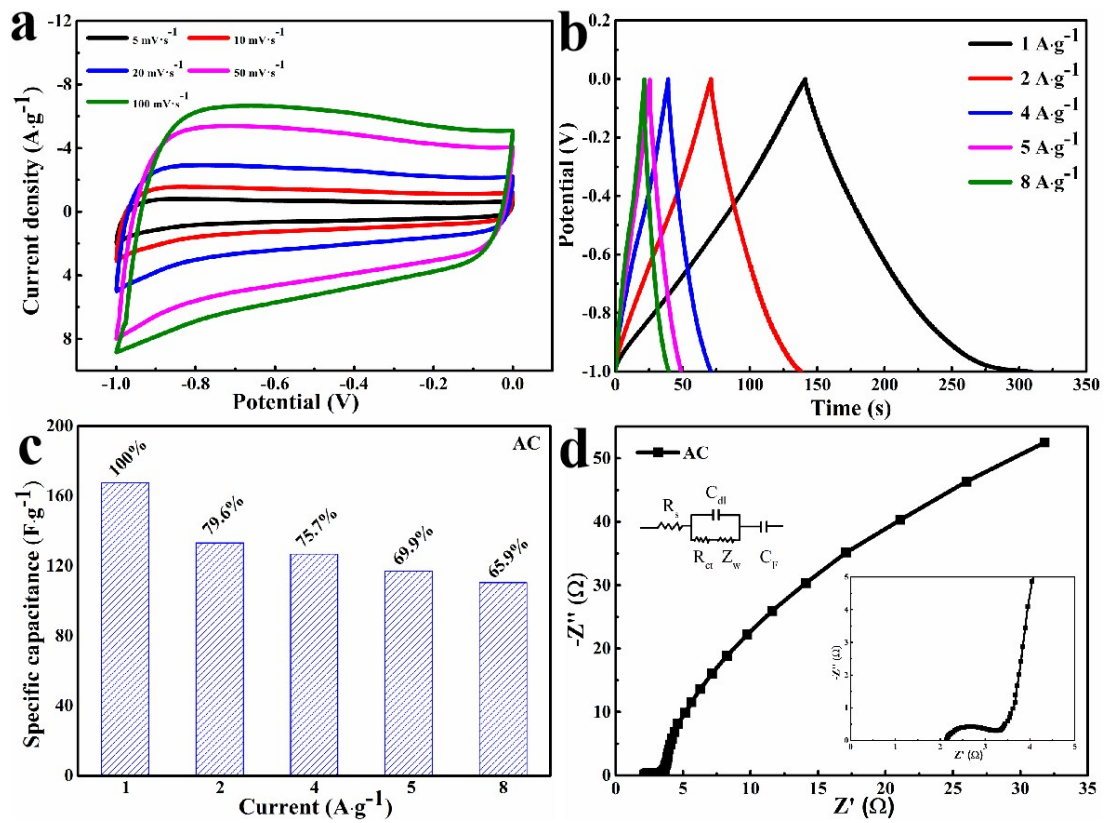

**Fig. S2.** Electrochemical properties of activated carbon (AC) under three electrode system: (a) CV curves at different scan rates; (b) GCD curves at different current densities; (c) Calculated specific capacitances of AC as a function of current density; (d) Nyquist plots.

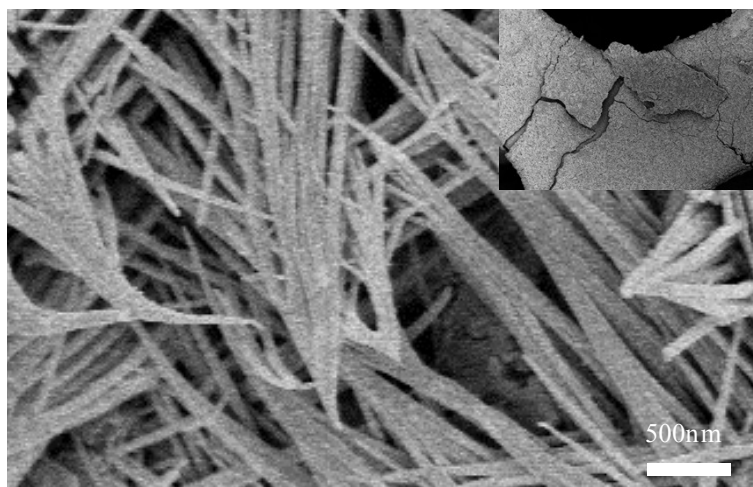

**Fig. S3.** FESEM images of 4M-P@NiCo LDHs after 5000 charge-discharge cycles.

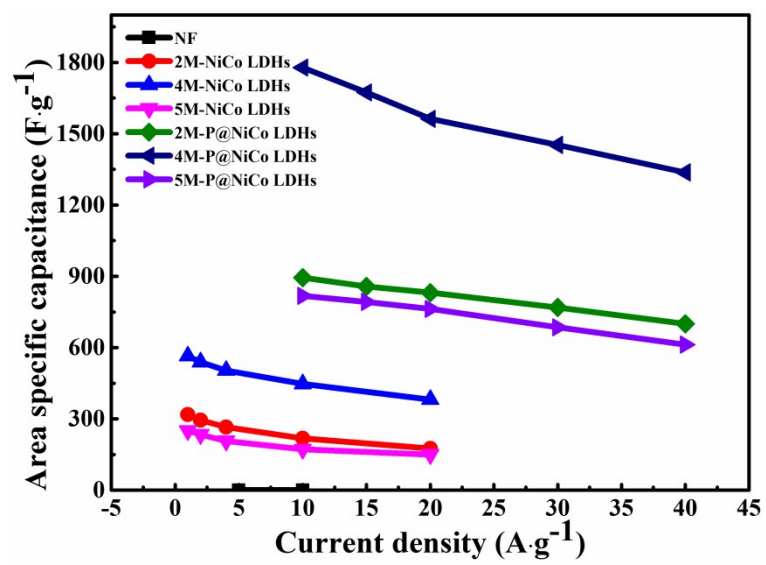

Fig. S4. calculated mass specific capacitance of different obtained electrodes at various current densities.

**Table. S1.** Structural parameters obtained from N<sub>2</sub> adsorption isotherms analysis.

| <b>samples</b> | <b>SBET(m<sup>2</sup>g<sup>-1</sup>)<sup>a)</sup></b> | <b>Pore volume(cm<sup>3</sup>g<sup>-1</sup>)<sup>b)</sup></b> | <b>Average pore size(nm)<sup>b)</sup></b> |
|----------------|-------------------------------------------------------|---------------------------------------------------------------|-------------------------------------------|
| NiCo LDHs      | 3.93                                                  | 0.00464                                                       | 4.96                                      |
| 4M-P@NiCo LDHs | 10.27                                                 | 0.00861                                                       | 3.53                                      |

a)Obtained from BET method;

b)Total pore volume taken from the N<sub>2</sub> adsorption volume at a relative pressure (P/P<sub>0</sub>) of 0.99.

**Table. S2.** element components of electrode material before and after phosphatized treatment obtained by XPS detection (At % )

| <b>element</b>    | <b>4M-NiCo LDHs</b>                                   | <b>4M-P@NiCo LDHs</b> |
|-------------------|-------------------------------------------------------|-----------------------|
| <b>sample</b>     |                                                       |                       |
| Ni                | 15.7                                                  | 3.77                  |
| Co                | 24.9                                                  | 7.23                  |
| O                 | 59.34                                                 | 41.27                 |
| P                 | -                                                     | 47.73                 |
| Phosphatized rate | About 18% (measured by the decrease of oxygen element |                       |

**Table. S3.** Comparison of areal capacitances of LDHs based electrodes in references.

| electrode materials                                                             | electrolyte | Areal capacitance<br>(F cm <sup>-2</sup> ) | reference |
|---------------------------------------------------------------------------------|-------------|--------------------------------------------|-----------|
| Ni(OH) <sub>2</sub> /NiCo <sub>2</sub> O <sub>4</sub> /<br>carbon fiber paper   | 1 M KOH     | 5.2 (2 mA cm <sup>-2</sup> )               | 1         |
| NiCo-CO <sub>3</sub> LDH<br>grown on Ni foam                                    | 2 M KOH     | 6.2 (2 mA cm <sup>-2</sup> )               | 2         |
| Ni-P@NiCo LDH<br>Decorated Ni Foam                                              | 6 M KOH     | 6.4 (100 mA cm <sup>-2</sup> )             | 3         |
| NiCo <sub>2</sub> S <sub>4</sub> nanotube NiMn-LDH<br>arrays 3D graphene sponge | 6 M KOH     | 1.26 (10 mA cm <sup>-2</sup> )             | 4         |
| Ni-Co-LDH/graphene composites                                                   | 6 M KOH     | 0.16 (16 mA cm <sup>-2</sup> )             | 5         |
| NiP@CoAl-LDH<br>nanotube arrays                                                 | 2 M KOH     | 1 (20 mA cm <sup>-2</sup> )                | 6         |
| Ni - Co LDH/3D<br>Graphene Nickel Foam                                          | 6 M KOH     | 1.25 (50 mA cm <sup>-2</sup> )             | 7         |
| CoAl-LDH/NiCo <sub>2</sub> S <sub>4</sub> sheets                                | 2 M KOH     | 2.4 (10 mA cm <sup>-2</sup> )              | 8         |
| Ni(OH) <sub>2</sub> and Cu<br>grown on Ni foam                                  | 2 M KOH     | 5.2 (50 mA cm <sup>-2</sup> )              | 9         |

---

|                                 |         |                             |            |
|---------------------------------|---------|-----------------------------|------------|
| 4M-P@NiCo LDHs grown on Ni foam | 6 M KOH | 7 (50 mA cm <sup>-2</sup> ) | This works |
|---------------------------------|---------|-----------------------------|------------|

---

[1] L. Huang, D. Chen, Y. Ding, Z. L. Wang, Z. Zeng, M. Liu, Hybrid composite Ni(OH)<sub>2</sub>@NiCo<sub>2</sub>O<sub>4</sub> grown on carbon fiber paper for high-performance supercapacitors, *ACS Appl. Mater. Interfaces*, 2013, **5**, 11159-11162.

[2] W. Zou, W. Guo, X. Liu, Y. Luo, Q. Ye, X. Xu, F. Wang, Anion exchange of Ni-Co layered double hydroxide (LDH) nanoarrays for a high-capacitance supercapacitor electrode: A comparison of alkali anion exchange and sulfuration, *Chem. - Eur. J.*, 2018, **4**, 19309-19316.

[3] J. Xing, J. Du, X. Zhang, Y. Shao, T. Zhang, C. Xu, A Ni-P@NiCo LDH core-shell nanorod-decorated nickel foam with enhanced areal specific capacitance for high-performance supercapacitors, *Dalton Trans.*, 2017, **46**, 10064-10072.

[4] H. Wan, J. Liu, Y. Ruan, L. Lv, L. Peng, X. Ji, L. Miao, J. Jiang, Hierarchical configuration of NiCo<sub>2</sub>S<sub>4</sub> nanotube@Ni-Mn layered double hydroxide arrays three dimensional graphene sponges as electrode materials for high-capacitance supercapacitors, *ACS Appl. Mater. Interfaces*, 2015, **7**, 15840-15847.

[5] W. Quan, Z. L. Tang, S. T. Wang, Y. Hong, Facile preparation of free-standing rGO paper-based N-Mn LDH/graphene superlattice composites as a pseudocapacitive electrode, *Chem. Commun.*, 2016, **52**, 3694-3696.

[6] S. Wang, Z. Huang, R. Li, X. Zheng, F. Lu, T. He, Template-assisted synthesis of NiP@CoAl-LDH nanotube arrays with superior electrochemical performance for supercapacitors, *Electrochim. Acta*, 2016, **204**, 160-168.

[7] X. Bai, Q. Liu, H. Zhang, J. Liu, Z. Li, X. Jing, Y. Yuan, L. Liu, J. Wang, Nickel-Cobalt layered double hydroxide nanowires on three dimensional graphene nickel foam for high performance asymmetric supercapacitors, *Electrochim. Acta*, 2016, **215**, 492-499.

[8] X. Zhang, S. Wang, L. Xu, T. He, F. Lu, H. Li, J. Ye, Controllable synthesis of cross-linked CoAl-LDH/NiCo<sub>2</sub>S<sub>4</sub> sheets for high performance asymmetric supercapacitors, *Ceram. Int.*, 2017, **43**, 14168-14175.

[9] D. Shi, L. Zhang, X. Yin, T. J. Huang, H. Gong, A one step processed advanced interwoven architecture of Ni(OH)<sub>2</sub> and Cu nanosheets with ultrahigh supercapacitor performance, *J. Mater. Chem. A*, 2016, **4**, 12144-12151.
